# Supplementary material for: Compound Risks of Hurricane Evacuation Amid the COVID‐19 Pandemic in the United States
Source: PubMed Central journal article supplement (PMC7704390; doi:10.1029/2020gh000319), 2020-12-01
Supplement: GH2-4-e2020GH000319-s001.pdf [file GH2-4-e2020GH000319-s001.pdf]

**Compound Risks of Hurricane Evacuation amid the COVID-19 Pandemic in the United States**

**Sen Pei<sup>1\*</sup>, Kristina A. Dahl<sup>2\*</sup>, Teresa K. Yamana<sup>1</sup>, Rachel Licker<sup>2</sup>, Jeffrey Shaman<sup>1</sup>**

<sup>1</sup>Department of Environmental Health Sciences, Mailman School of Public Health, Columbia University, New York, NY 10032, USA

<sup>2</sup>Climate & Energy Program, Union of Concerned Scientists, Cambridge, MA, Washington, DC, and Oakland, CA, USA

**Contents of this file**

Text S1 to S2  
 Figures S1 to S6  
 Tables S1 to S5

**Introduction**

The information here supports the manuscript listed above and includes text, figures, and tables. The data were generated in July and August, 2020.

**Text S1. Transmission model for 3,142 US counties**

We formulate COVID-19 transmission as a discrete Markov process during both day and night. Daytime transmission lasts for  $dt_1$  days and the nighttime transmission  $dt_2$  days ( $dt_1 + dt_2 = 1$ ). Here, we assume daytime transmission lasts for 8 hours and nighttime transmission lasts for 16 hours, i.e.,  $dt_1 = 1/3$  day and  $dt_2 = 2/3$  day. The transmission dynamics are depicted by the following equations.

Daytime transmission:

$$E_{ij}(t + dt_1) = E_{ij}(t) + \frac{\beta S_{ij}(t) \sum_k I_{ki}^r(t)}{N_i^D(t)} dt_1 + \frac{\mu \beta S_{ij}(t) \sum_k I_{ik}^u(t)}{N_i^D(t)} dt_1 - \frac{E_{ij}(t)}{Z} dt_1 + \theta dt_1 \frac{N_{ij} - I_{ij}^r(t)}{N_i^D(t)} \sum_{k \neq i} \frac{\bar{N}_{ik} \sum_l E_{kl}(t)}{N_k^D(t) - \sum_l I_{lk}^r(t)} - \theta dt_1 \frac{E_{ij}(t)}{N_i^D(t) - \sum_l I_{li}^r(t)} \sum_{k \neq i} \bar{N}_{ki} \quad (1)$$

$$I_{ij}^r(t + dt_1) = I_{ij}^r(t) + \alpha \frac{E_{ij}(t)}{Z} dt_1 - \frac{I_{ij}^r(t)}{D} dt_1 \quad (2)$$

$$I_{ij}^u(t + dt_1) = I_{ij}^u(t) + (1 - \alpha) \frac{E_{ij}(t)}{Z} dt_1 - \frac{I_{ij}^u(t)}{D} dt_1 + \theta dt_1 \frac{N_{ij} - I_{ij}^r(t)}{N_i^D(t)} \sum_{k \neq i} \frac{\bar{N}_{ik} \sum_l I_{kl}^u(t)}{N_k^D(t) - \sum_l I_{lk}^r(t)} - \theta dt_1 \frac{I_{ij}^u(t)}{N_i^D(t) - \sum_l I_{li}^r(t)} \sum_{k \neq i} \bar{N}_{ki} \quad (3)$$

$$R_{ij}(t + dt_1) = R_{ij}(t) + \frac{I_{ij}^r(t)}{D} dt_1 + \frac{I_{ij}^u(t)}{D} dt_1 + \theta dt_1 \frac{N_{ij} - I_{ij}^r(t)}{N_i^D(t)} \sum_{k \neq i} \frac{\bar{N}_{ik} \sum_l R_{kl}(t)}{N_k^D(t) - \sum_l I_{lk}^r(t)} - \theta dt_1 \frac{R_{ij}(t)}{N_i^D(t) - \sum_l I_{li}^r(t)} \sum_{k \neq i} \bar{N}_{ki} \quad (4)$$

$$N_i^D(t) = N_{ii} + \sum_{k \neq i} I_{ki}^r(t) + \sum_{k \neq i} (N_{ik} - I_{ik}^r(t)) \quad (5)$$

Nighttime transmission:

$$E_{ij}(t + 1) = E_{ij}(t + dt_1) + \frac{\beta S_{ij}(t + dt_1) \sum_k I_{kj}^r(t + dt_1)}{N_j^N} dt_2 + \frac{\mu \beta S_{ij}(t + dt_1) \sum_k I_{kj}^u(t + dt_1)}{N_j^N} dt_2 - \frac{E_{ij}(t + dt_1)}{Z} dt_2 + \theta dt_2 \frac{N_{ij}}{N_j^N} \sum_{k \neq j} \frac{\bar{N}_{jk} \sum_l E_{lk}(t + dt_1)}{N_k^N - \sum_l I_{lk}^r(t + dt_1)} - \theta dt_2 \frac{E_{ij}(t + dt_1)}{N_j^N - \sum_k I_{kj}^r(t + dt_1)} \sum_{k \neq j} \bar{N}_{kj} \quad (6)$$

$$I_{ij}^r(t + 1) = I_{ij}^r(t + dt_1) + \alpha \frac{E_{ij}(t + dt_1)}{Z} dt_2 - \frac{I_{ij}^r(t + dt_1)}{D} dt_2 \quad (7)$$

$$I_{ij}^u(t + 1) = I_{ij}^u(t + dt_1) + (1 - \alpha) \frac{E_{ij}(t + dt_1)}{Z} dt_2 - \frac{I_{ij}^u(t + dt_1)}{D} dt_2 + \theta dt_2 \frac{N_{ij}}{N_j^N} \sum_{k \neq j} \frac{\bar{N}_{jk} \sum_l I_{lk}^u(t + dt_1)}{N_k^N - \sum_l I_{lk}^r(t + dt_1)} - \theta dt_2 \frac{I_{ij}^u(t + dt_1)}{N_j^N - \sum_k I_{kj}^r(t + dt_1)} \sum_{k \neq j} \bar{N}_{kj} \quad (8)$$

$$R_{ij}(t + 1) = R_{ij}(t + dt_1) + \frac{I_{ij}^r(t + dt_1)}{D} dt_2 + \frac{I_{ij}^u(t + dt_1)}{D} dt_2 + \theta dt_2 \frac{N_{ij}}{N_j^N} \sum_{k \neq j} \frac{\bar{N}_{jk} \sum_l R_{lk}(t + dt_1)}{N_k^N - \sum_l I_{lk}^r(t + dt_1)} - \theta dt_2 \frac{R_{ij}(t + dt_1)}{N_j^N - \sum_k I_{kj}^r(t + dt_1)} \sum_{k \neq j} \bar{N}_{kj} \quad (9)$$

$$N_i^N = \sum_k N_{ki} \quad (10)$$

Here,  $S_{ij}$ ,  $E_{ij}$ ,  $I_{ij}^r$ ,  $I_{ij}^u$ ,  $R_{ij}$  and  $N_{ij}$  are the susceptible, exposed, reported infected, unreported infected, recovered and total populations in the subpopulation commuting from county  $j$  to county  $i$  ( $i \leftarrow j$ ), where  $S_{ij} = N_{ij} - E_{ij} - I_{ij}^r - I_{ij}^u - R_{ij}$ ;  $\beta$  is the transmission rate of reported

infections;  $\mu$  is the relative transmissibility of unreported infections;  $Z$  is the average latency period (from infection to contagiousness);  $D$  is the average duration of contagiousness;  $\alpha$  is the fraction of documented infections;  $\theta$  is a multiplicative factor adjusting random movement;  $\bar{N}_{ij} = (N_{ij} + N_{ji})/2$  is the average number of commuters between counties  $i$  and  $j$ ; and  $N_i^D$  and  $N_i^N$  are the daytime and nighttime populations of county  $i$ .

**Text S2. The pseudo-code for the greedy optimization algorithm**

Input:

Origin  $i = 1, 2, \dots, n$

Destination  $j = 1, 2, \dots, m$ , where  $R_e(1) \geq R_e(2) \geq \dots \geq R_e(m)$

Evacuation matrix  $\mathbf{V} = \{V_{ji}\}$ ,  $V_{ji}$  is the number of evacuees from origin  $i$  to destination  $j$  in the baseline scenario

Capacity of evacuees that can be accommodated by each destination:  $C_j$

The fraction of evacuees that can't be reallocated for each origin-destination pair:  $p$

Variables:

$u_i$ : the current number of evacuees in origin  $i$  that could be reallocated to different counties

$v$ : the currently available destination county with lowest  $R_e$ .

$\mathbf{M}$ : the current evacuation matrix,  $M_{vi}$  is the number of evacuees assigned from origin  $i$  to destination  $v$ .

Initial conditions:

$v = m$

$u_i = (1 - p) \sum_j V_{ji}$

$\mathbf{M} = p\mathbf{V}$

Algorithm:

While  $\max(u_i) > 0$

For  $i = 1$  to  $n$

$\mathbf{M}^i = \mathbf{M}$ : reallocating from origin  $i$  to  $v$

$M_{vi}^i = \min(M_{vi} + (C_v - \sum_j M_{vj}), M_{vi} + u_i)$

$u_{temp}^i = u_i - (M_{vi}^i - M_{vi})$

Run projection using  $\mathbf{M}^i$

$Inf_i$ : total infection in all origin and destination counties

End

$k = \min_i Inf_i$

$\mathbf{M} = \mathbf{M}^k$

$u_k = u_{temp}^k$

If  $\sum_j M_{vj} == C_v$

$v = v - 1$

End

End

Output  $\mathbf{M}$  as the optimized evacuation matrix.

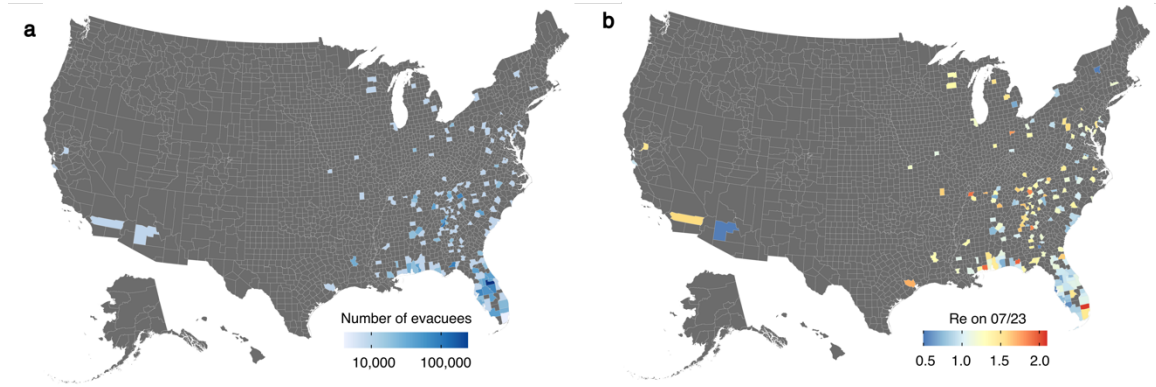

**Figure S1.** Statistics in destination counties. (a) The number of evacuees accepted by 165 destination counties in the baseline scenario. (b) The estimated effective reproductive numbers,  $R_e$ , for both origin and destination counties on July 23, 2020.

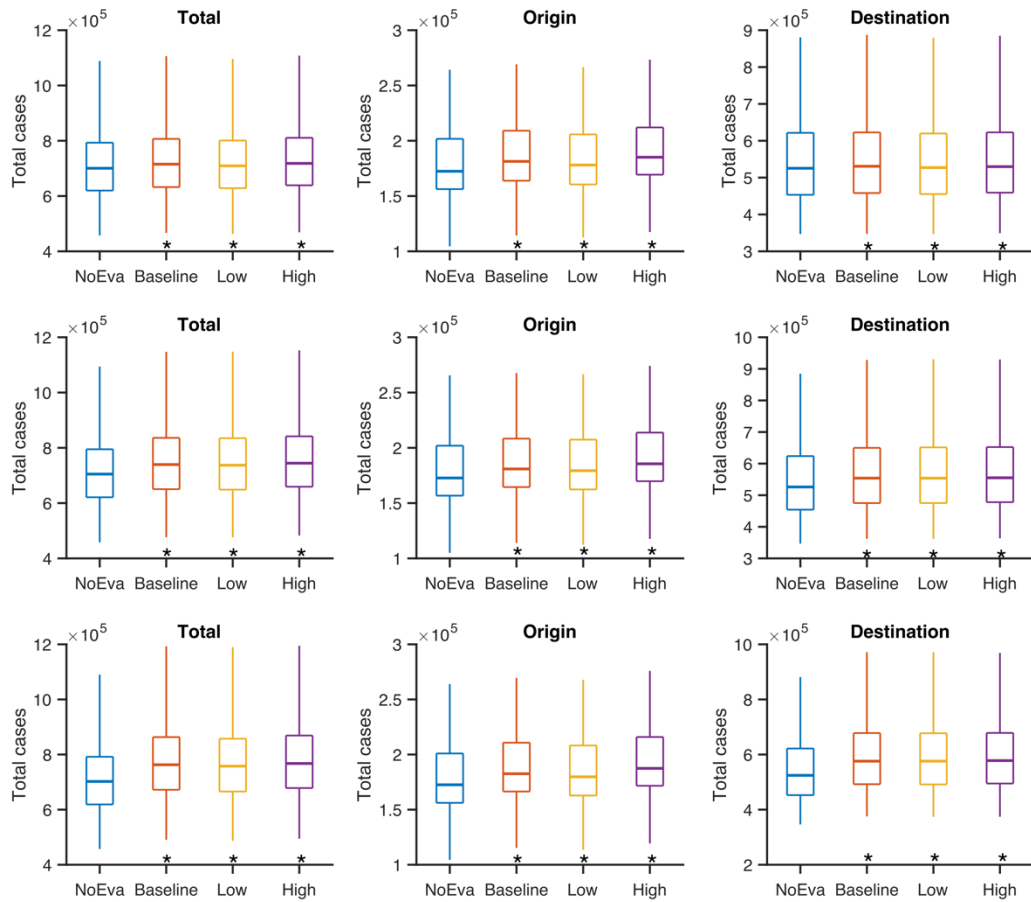

**Figure S2.** Comparison of total cases in the origin and destination counties combined (left column), the origin counties only (middle column) and destination counties only (right column) for the no-evacuation, baseline, low and high evacuation scenarios. Simulations were performed for three settings: no increase (top row), 10% increase (middle row) and 20% increase (bottom row) of transmission rates in destination counties. Box plots show the median and interquartile and whiskers show the 95% CIs. Asterisks indicate that excess cases are significantly higher than the no-evacuation scenario (Wilcoxon signed rank test,  $p < 10^{-5}$ ).

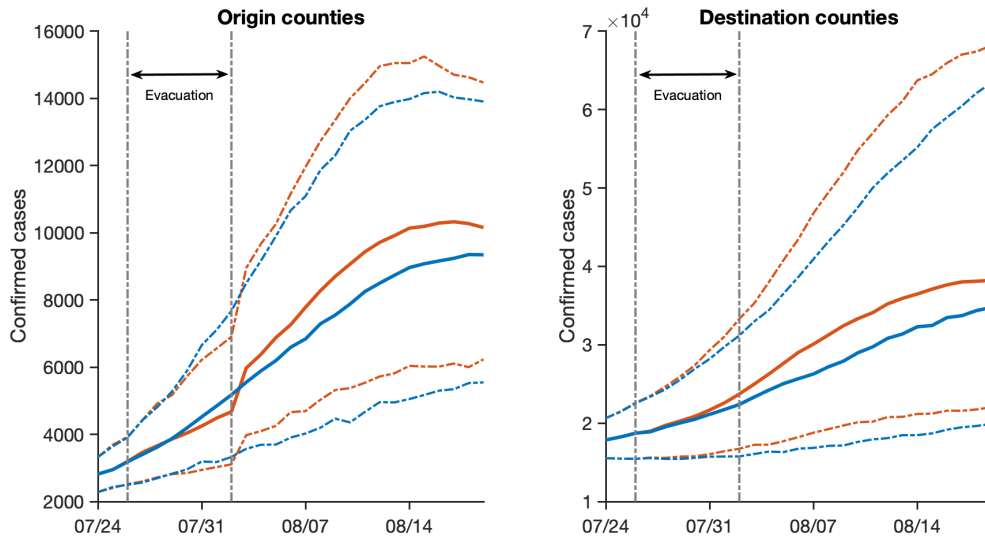

**Figure S3.** Time series for confirmed cases in origin and destinations counties. Simulations were performed for the no-evacuation scenario (blue line) and the high evacuation scenario with 20% increase of transmission rate in destination counties (red line). Blue and red dashed lines indicate 95% CIs of simulation results from 100 runs.

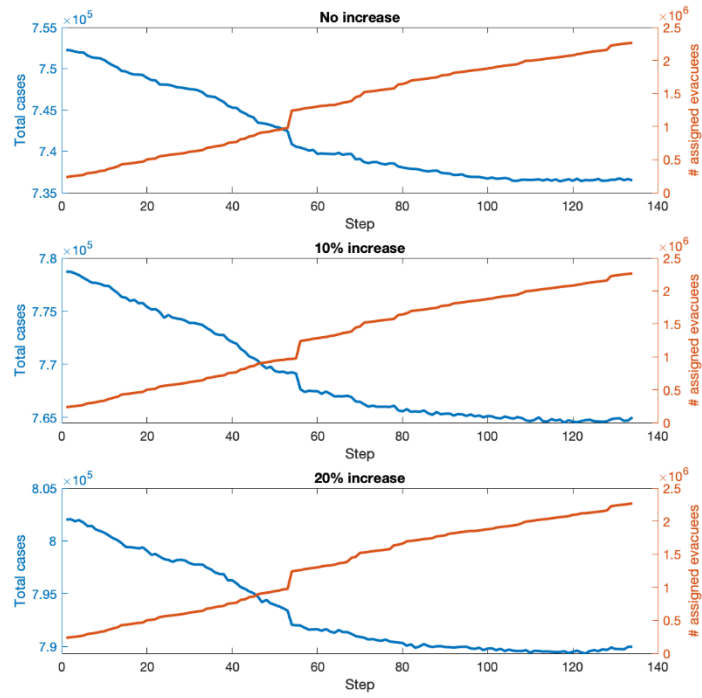

**Figure S4.** Evolution of the total cases (blue lines) and the number of assigned evacuees (red lines) in the greedy algorithm. Results are shown for the settings with no increase, 10% increase and 20% increase of transmission rates in destination counties. The optimization starts from an evacuation matrix  $0.1 \times \mathbf{V}$ , where  $\mathbf{V}$  represents the evacuation matrix in the baseline scenario.

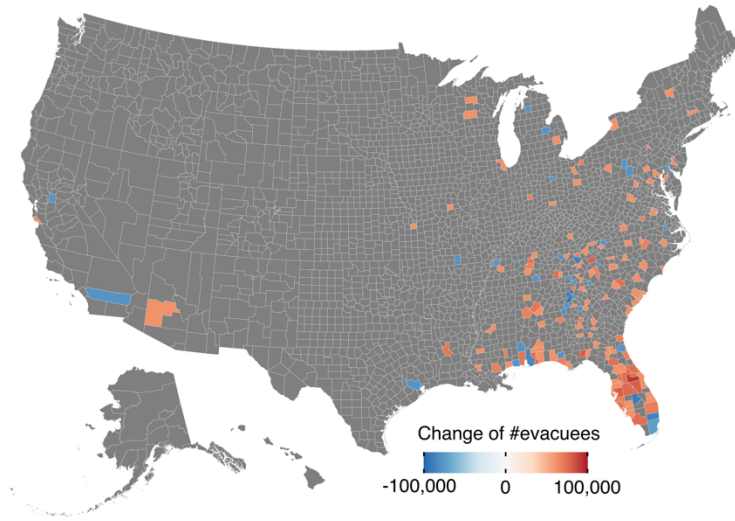

**Figure S5.** The change in the number of evacuees to destination counties in the optimized evacuation plan compared with the baseline evacuation scenario. Evacuation was optimized for the setting in which transmission rates in destination counties increase by 10%.



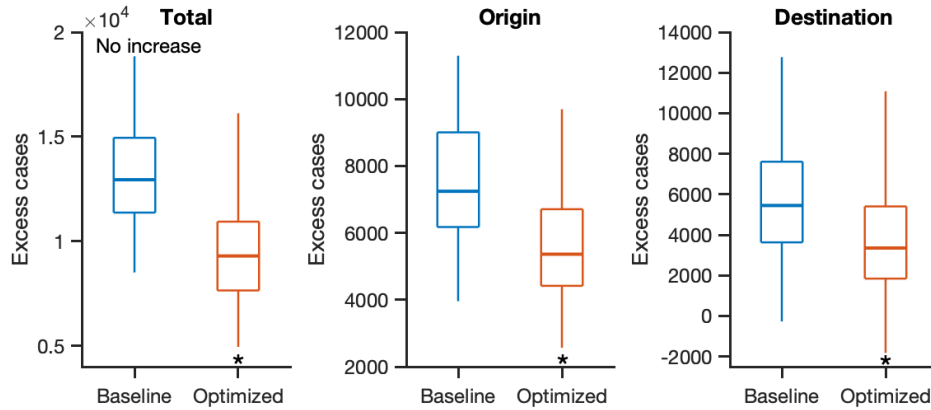

**Figure S6.** Sensitivity analysis of optimization assuming 20% of evacuees cannot be relocated. Excess cases for the baseline and optimized evacuation scenarios are compared for the origin and destination counties combined (left column), only origin counties (middle column) and only destination counties (right column). Simulations were performed with no increase of transmission rates in destination counties. Boxes and whiskers show the median, interquartile and 95% CIs. Asterisks indicate that excess cases are significantly lower than the baseline scenario (Wilcoxon signed rank test,  $p < 10^{-5}$ ). Results are obtained from 100 model simulations.

| Parameter/variable                                                                                       | Values               | Source             |
|----------------------------------------------------------------------------------------------------------|----------------------|--------------------|
| Baseline transmission rate ( $\beta_0$ , days <sup>-1</sup> )                                            | 0.95 (0.84, 1.06)    | Pei et al., (2020) |
| Relative transmission rate ( $\mu$ )                                                                     | 0.64 (0.56, 0.70)    | Pei et al., (2020) |
| Latency period ( $Z$ , days)                                                                             | 3.59 (3.28, 3.99)    | Pei et al., (2020) |
| Infectious period ( $D$ , days)                                                                          | 3.56 (3.21, 3.83)    | Pei et al., (2020) |
| Mobility factor ( $\theta$ )                                                                             | 0.15 (0.12, 0.17)    | Pei et al., (2020) |
| Reporting rate ( $\alpha$ )                                                                              | 0.080 (0.069, 0.093) | Pei et al., (2020) |
| Evacuation time ( $T_{eva}$ , days)                                                                      | 7                    | Assigned           |
| Pre- and post-evacuation (days)                                                                          | 3                    | Assigned           |
| Increased transmission in origin                                                                         | 20%                  | Assigned           |
| Increased transmission in destination                                                                    | 0%, 10%, 20%         | Assigned           |
| Percentage of evacuees who cannot be reallocated from their baseline destination                         | 10%                  | Assigned           |
| Capacity of destination counties as a percentage of the number of evacuees received in baseline scenario | 120%                 | Assigned           |

**Table S1.** Parameter settings in the full model simulation and optimization. The prior transmission rate in each county is scaled by population density using a baseline transmission rate  $\beta_0$  as inferred through March 13, 2020. The relative transmission rate ( $\mu$ ), latency period ( $Z$ ), infectious period ( $D$ ) and mobility factor ( $\theta$ ) are fixed at posterior values inferred through March 13, 2020. Values are shown for the median and 95% CIs in the parentheses.

|                                         | 0% $R_e$ increase in destination |                   | 10% $R_e$ increase in destination |                   | 20% $R_e$ increase in destination |                   |
|-----------------------------------------|----------------------------------|-------------------|-----------------------------------|-------------------|-----------------------------------|-------------------|
|                                         | Origin cases                     | Destination cases | Origin cases                      | Destination cases | Origin cases                      | Destination cases |
| <b>No Evacuation</b>                    | 172,400                          | 525,320           | 172,692                           | 526,044           | 172,562                           | 524,467           |
| <b>Baseline evacuation</b>              | 181,322                          | 530,706           | 180,901                           | 553,971           | 182,590                           | 575,891           |
| <b>High <math>R_e</math> evacuation</b> | 185,100                          | 529,781           | 185,527                           | 555,062           | 187,431                           | 577,885           |
| <b>Low <math>R_e</math> evacuation</b>  | 178,029                          | 527,180           | 179,317                           | 553,875           | 179,788                           | 576,043           |

**Table S2.** The median number of total cases in origin and destination counties for different evacuation scenarios (no evacuation, baseline, low and high) and levels of elevated transmission rates ( $R_e$ ) in destination counties (no change, 10% increase, 20% increase). In the no evacuation scenario ( $R_e$ ) in destination counties is not increased. Note that the median excess cases shown in Table 1 is not necessarily the difference of the median total cases between the evacuation and non-evacuation scenarios shown in Table S1. That is,  $median(totalcase_{eva}(i) - totalcase_{noeva}(i)) \neq median(totalcase_{eva}(i)) - median(totalcase_{noeva}(i))$ , where  $totalcase_{eva}(i)$  and  $totalcase_{noeva}(i)$  are the total numbers of cases for evacuation and non-evacuation scenarios in the  $i$ th simulation.

| Palm Beach County FL      |       | Broward County FL       |       | Miami-Dade County FL          |        | Monroe County FL          |      |
|---------------------------|-------|-------------------------|-------|-------------------------------|--------|---------------------------|------|
| Leon County<br>FL         | 67926 | Polk County<br>FL       | 42726 | Orange<br>County FL           | 277387 | Sullivan<br>County TN     | 8333 |
| Natchitoches<br>Parish LA | 25472 | Escambia<br>County FL   | 34181 | Hillsborough<br>County FL     | 60678  | Walton<br>County FL       | 8333 |
| Davidson<br>County TN     | 25472 | Lake County<br>FL       | 34181 | Osceola<br>County FL          | 60678  | Spalding<br>County GA     | 8333 |
| Marion<br>County IN       | 16981 | Richland<br>County SC   | 34181 | Buncombe<br>County NC         | 60678  | Tift County<br>GA         | 8333 |
| Jefferson<br>County TN    | 16981 | Volusia<br>County FL    | 34181 | Alachua<br>County FL          | 34674  | Forsyth<br>County GA      | 649  |
| Camden<br>County GA       | 16981 | Collier<br>County FL    | 34181 | Jefferson<br>County AL        | 26005  | Orange<br>County FL       | 399  |
| Macon<br>County GA        | 16981 | Hamilton<br>County TN   | 34181 | Mobile<br>County AL           | 26005  | Fulton<br>County GA       | 125  |
| Forsyth<br>County GA      | 16357 | Seminole<br>County FL   | 34181 | Palm Beach<br>County FL       | 20372  | Leon County<br>FL         | 100  |
| Montour<br>County PA      | 8491  | Sarasota<br>County FL   | 25635 | Tammany<br>Parish LA          | 17336  | Hillsborough<br>County FL | 87   |
| Franklin<br>County VA     | 8491  | Sumter<br>County FL     | 25635 | Forrest<br>County MS          | 17336  | Osceola<br>County FL      | 87   |
| Clay County<br>KY         | 8491  | Lee County<br>AL        | 17090 | Manatee<br>County FL          | 17336  | Buncombe<br>County NC     | 87   |
| Harrison<br>County MS     | 8491  | St. Johns<br>County FL  | 17090 | Prince<br>Edward<br>County VA | 17336  | Polk County<br>FL         | 62   |
| Dougherty<br>County GA    | 8491  | Bay County<br>FL        | 17090 | Oneida<br>County WI           | 8668   | Broward<br>County FL      | 50   |
| Anderson<br>County TN     | 8491  | Medina<br>County OH     | 17090 | Stanly<br>County NC           | 8668   | Cobb<br>County GA         | 50   |
| Gibson<br>County TN       | 8491  | Greenville<br>County SC | 17090 | Baltimore<br>County MD        | 8668   | Highlands<br>County FL    | 50   |
| Sumter<br>County GA       | 8491  | Tuscaloosa<br>County AL | 17090 | Watauga<br>County NC          | 8668   | Alachua<br>County FL      | 50   |
| Florence<br>County SC     | 8491  | Williamson<br>County TN | 17090 | Winchester<br>city VA         | 8668   | Escambia<br>County FL     | 50   |
| Marathon<br>County WI     | 8491  | Wake<br>County NC       | 13191 | Maury<br>County TN            | 8668   | Lake County<br>FL         | 50   |
| Gulf County<br>FL         | 8491  | Montgomery<br>County MD | 8545  | Queen<br>Anne's<br>County MD  | 8668   | Richland<br>County SC     | 50   |
| Jefferson<br>County FL    | 8491  | Hamilton<br>County OH   | 8545  | Lexington<br>County SC        | 8668   | Volusia<br>County FL      | 50   |

**Table S3.** The optimized evacuation plan (no increase of transmission rates in destination counties). We show the top 20 destinations for each origin county.

| Palm Beach County FL |       | Broward County FL |       | Miami-Dade County FL |        | Monroe County FL |      |
|----------------------|-------|-------------------|-------|----------------------|--------|------------------|------|
| Leon                 |       | Polk County       |       | Orange               |        | St. Johns        |      |
| County FL            | 67926 | FL                | 42726 | County FL            | 277387 | County FL        | 8969 |
| Jefferson            |       | Escambia          |       | Hillsborough         |        | Charleston       |      |
| County AL            | 25472 | County FL         | 34181 | County FL            | 60678  | County SC        | 8333 |
| Mobile               |       | Lake County       |       | Osceola              |        | Walton           |      |
| County AL            | 25472 | FL                | 34181 | County FL            | 60678  | County FL        | 8333 |
| Marion               |       | Richland          |       | Buncombe             |        | Oakland          |      |
| County IN            | 16981 | County SC         | 34181 | County NC            | 60678  | County MI        | 8333 |
| Macon                |       | Volusia           |       | Alachua              |        | Orange           |      |
| County GA            | 16981 | County FL         | 34181 | County FL            | 34674  | County FL        | 399  |
| Lee                  |       | Collier           |       | Natchitoches         |        | Fulton           |      |
| County AL            | 16981 | County FL         | 34181 | Parish LA            | 26005  | County GA        | 125  |
| Jefferson            |       | Hamilton          |       | Davidson             |        | Leon County      |      |
| County TN            | 11527 | County TN         | 34181 | County TN            | 26005  | FL               | 100  |
| Montour              |       | Seminole          |       | Palm Beach           |        | Hillsborough     |      |
| County PA            | 8491  | County FL         | 34181 | County FL            | 20372  | County FL        | 87   |
| Franklin             |       | Sarasota          |       | Camden               |        | Osceola          |      |
| County VA            | 8491  | County FL         | 25635 | County GA            | 17336  | County FL        | 87   |
| Clay                 |       | Sumter            |       | St. Tammany          |        | Buncombe         |      |
| County KY            | 8491  | County FL         | 25635 | Parish LA            | 17336  | County NC        | 87   |
| Harrison             |       | Bay County        |       | Forrest              |        | Polk County      |      |
| County MS            | 8491  | FL                | 17090 | County MS            | 17336  | FL               | 62   |
| Dougherty            |       | Manatee           |       | Forsyth              |        | Broward          |      |
| County GA            | 8491  | County FL         | 17090 | County GA            | 17336  | County FL        | 50   |
| Anderson             |       | Medina            |       | Wake County          |        | Cobb County      |      |
| County TN            | 8491  | County OH         | 17090 | NC                   | 17336  | GA               | 50   |
| Gibson               |       | Prince            |       | Tuscaloosa           |        | Highlands        |      |
| County TN            | 8491  | Edward            | 17090 | County AL            | 17336  | County FL        | 50   |
| Sumter               |       | Greenville        |       | Williamson           |        | Alachua          |      |
| County GA            | 8491  | County SC         | 17090 | County TN            | 17336  | County FL        | 50   |
| Florence             |       | Martin            |       | Gulf County          |        | Escambia         |      |
| County SC            | 8491  | County FL         | 8545  | FL                   | 8668   | County FL        | 50   |
| Marathon             |       | Baker             |       | Jefferson            |        | Lake County      |      |
| County WI            | 8491  | County FL         | 8545  | County FL            | 8668   | FL               | 50   |
| Towns                |       | Ben Hill          |       | Greene               |        | Richland         |      |
| County GA            | 8491  | County GA         | 8545  | County TN            | 8668   | County SC        | 50   |
| Frederick            |       | Santa Cruz        |       | Jackson              |        | Volusia          |      |
| County VA            | 8491  | County CA         | 8545  | County GA            | 8668   | County FL        | 50   |
| Pitt                 |       | Rockingham        |       | Madison              |        | Collier          |      |
| County NC            | 8491  | County VA         | 8545  | County MS            | 8668   | County FL        | 50   |

**Table S4.** The optimized evacuation plan (10% increase of transmission rates in destination counties). We show the top 20 destinations for each origin county.

| Palm Beach County FL |       | Broward County FL |       | Miami-Dade County FL |        | Monroe County FL |      |
|----------------------|-------|-------------------|-------|----------------------|--------|------------------|------|
| Leon                 |       | Polk              |       | Orange               |        | Dodge            |      |
| County FL            | 67926 | County FL         | 42726 | County FL            | 277387 | County GA        | 8333 |
| Davidson             |       | Escambia          |       | Hillsborough         |        | St. Lucie        |      |
| County TN            | 25472 | County FL         | 34181 | County FL            | 60678  | County FL        | 8333 |
| Jefferson            |       | Lake              |       | Osceola              |        | Erie County      |      |
| County AL            | 25472 | County FL         | 34181 | County FL            | 60678  | NY               | 8333 |
| Marion               |       | Richland          |       | Buncombe             |        | Maricopa         |      |
| County IN            | 16981 | County SC         | 34181 | County NC            | 60678  | County AZ        | 8333 |
| Jefferson            |       | Volusia           |       | Alachua              |        | Lexington        |      |
| County TN            | 16981 | County FL         | 34181 | County FL            | 34674  | County SC        | 637  |
| Wake                 |       | Collier           |       | Natchitoches         |        | Orange           |      |
| County NC            | 16981 | County FL         | 34181 | Parish LA            | 26005  | County FL        | 399  |
| Forsyth              |       | Hamilton          |       | Mobile               |        | Fulton           |      |
| County GA            | 12560 | County TN         | 34181 | County AL            | 26005  | County GA        | 125  |
| Montour              |       | Seminole          |       | Palm Beach           |        | Leon County      |      |
| County PA            | 8491  | County FL         | 34181 | County FL            | 20372  | FL               | 100  |
| Franklin             |       | Sarasota          |       | Camden               |        | Hillsborough     |      |
| County VA            | 8491  | County FL         | 25635 | County GA            | 17336  | County FL        | 87   |
| Clay County          |       | Sumter            |       | Macon                |        | Osceola          |      |
| KY                   | 8491  | County FL         | 25635 | County GA            | 17336  | County FL        | 87   |
| Harrison             |       | St. Johns         |       | St. Tammany          |        | Buncombe         |      |
| County MS            | 8491  | County FL         | 17090 | Parish LA            | 17336  | County NC        | 87   |
| Dougherty            |       | Bay County        |       | Forrest              |        | Polk County      |      |
| County GA            | 8491  | FL                | 17090 | County MS            | 17336  | FL               | 62   |
| Anderson             |       | Manatee           |       | Lee County           |        | Broward          |      |
| County TN            | 8491  | County FL         | 17090 | AL                   | 17336  | County FL        | 50   |
| Gibson               |       | Medina            |       | Tuscaloosa           |        | Cobb County      |      |
| County TN            | 8491  | County OH         | 17090 | County AL            | 17336  | GA               | 50   |
|                      |       | Prince            |       |                      |        |                  |      |
| Sumter               |       | Edward            |       | Gulf County          |        | Highlands        |      |
| County GA            | 8491  | County VA         | 17090 | FL                   | 8668   | County FL        | 50   |
| Marathon             |       | Greenville        |       | Jefferson            |        | Alachua          |      |
| County WI            | 8491  | County SC         | 17090 | County FL            | 8668   | County FL        | 50   |
| Towns                |       | Williamson        |       | Greene               |        | Escambia         |      |
| County GA            | 8491  | County TN         | 17090 | County TN            | 8668   | County FL        | 50   |
| Frederick            |       | Winston           |       | Jackson              |        | Lake County      |      |
| County VA            | 8491  | County AL         | 8545  | County GA            | 8668   | FL               | 50   |
| Pitt County          |       | Escambia          |       | Madison              |        | Richland         |      |
| NC                   | 8491  | County AL         | 8545  | County MS            | 8668   | County SC        | 50   |
| Habersham            |       | Robeson           |       | Oneida               |        | Volusia          |      |
| County GA            | 8491  | County NC         | 8545  | County WI            | 8668   | County FL        | 50   |

**Table S5.** The optimized evacuation plan (20% increase of transmission rates in destination counties). We show the top 20 destinations for each origin county.
